# Supplementary material for: Pomegranate Cultivars with Diverse Origins Exhibit Strong Resistance to Anthracnose Fruit Rot Caused by Colletotrichum gloeosporioides, a Major Disease in Southeast United States
Source: MDPI journal article supplement (doi:10.3390/horticulturae9101097), 2023-10-03
Supplement: s1 [file s1]

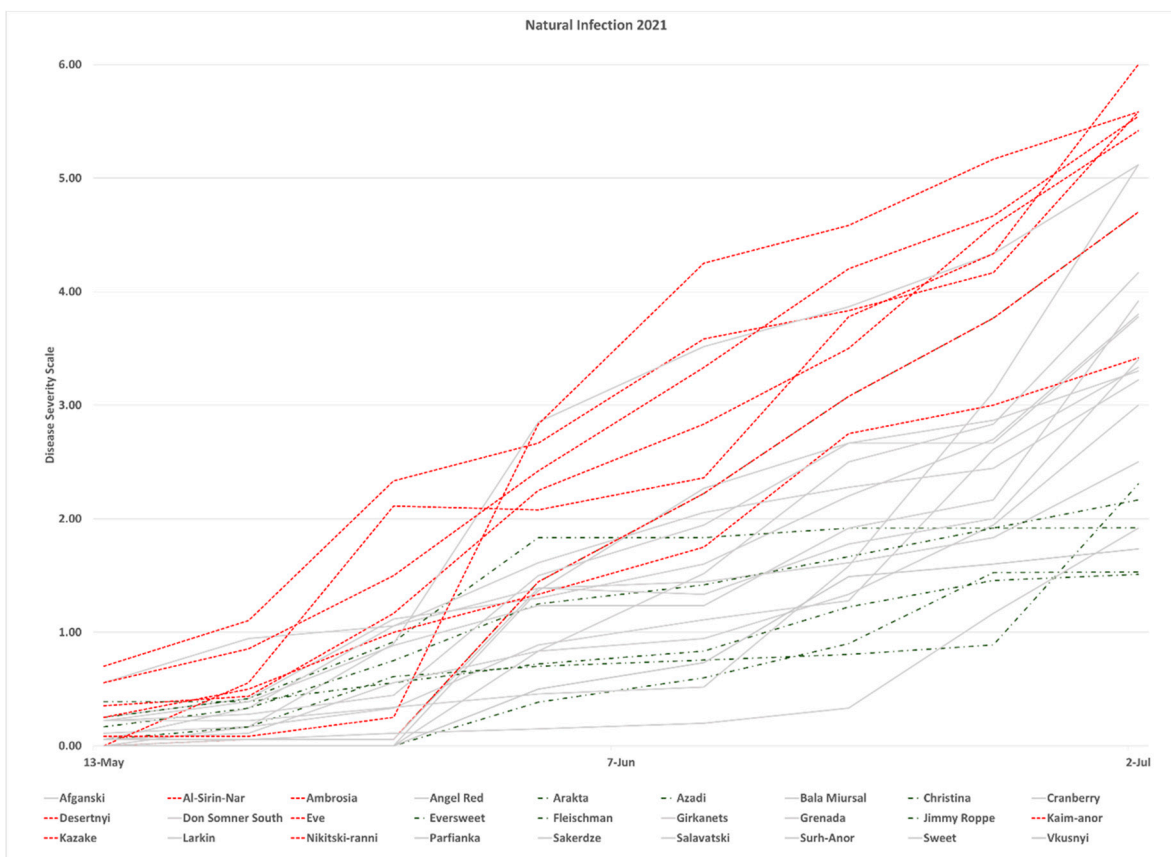

**Figure S1.** Disease progression of natural infection 2021

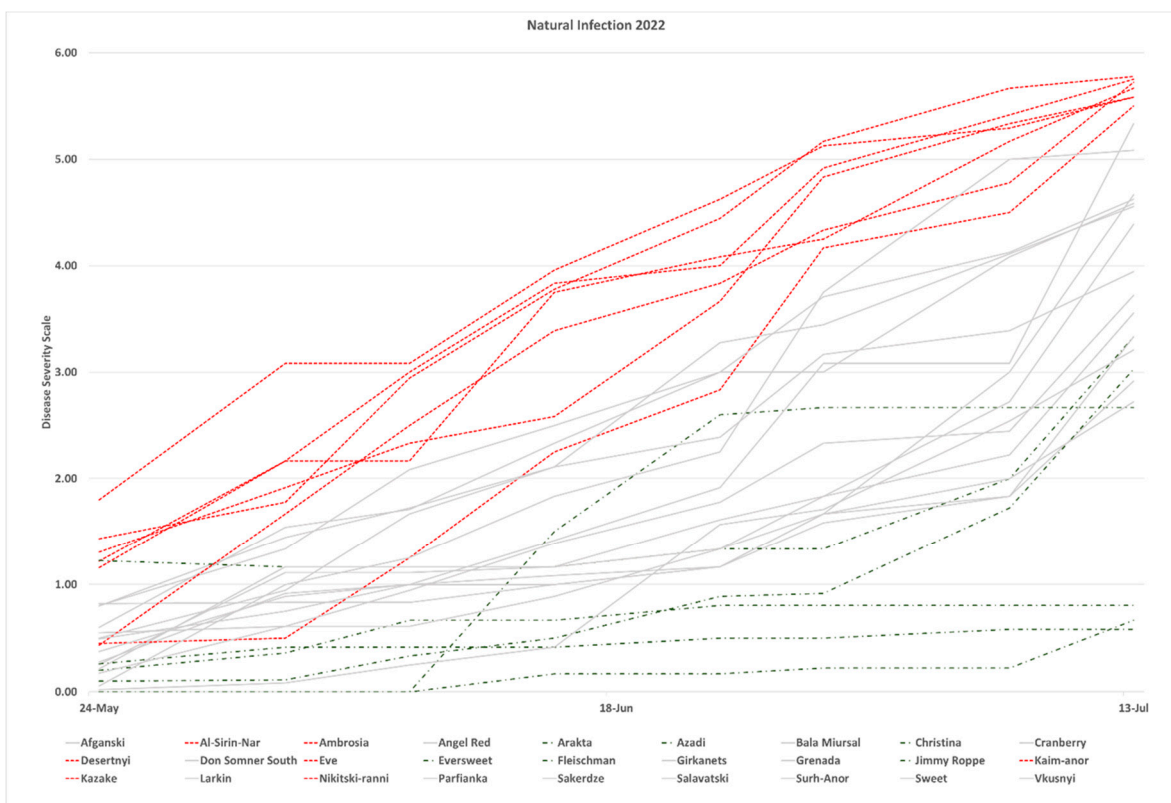

**Figure S2.** Disease progression of natural infection 2022.

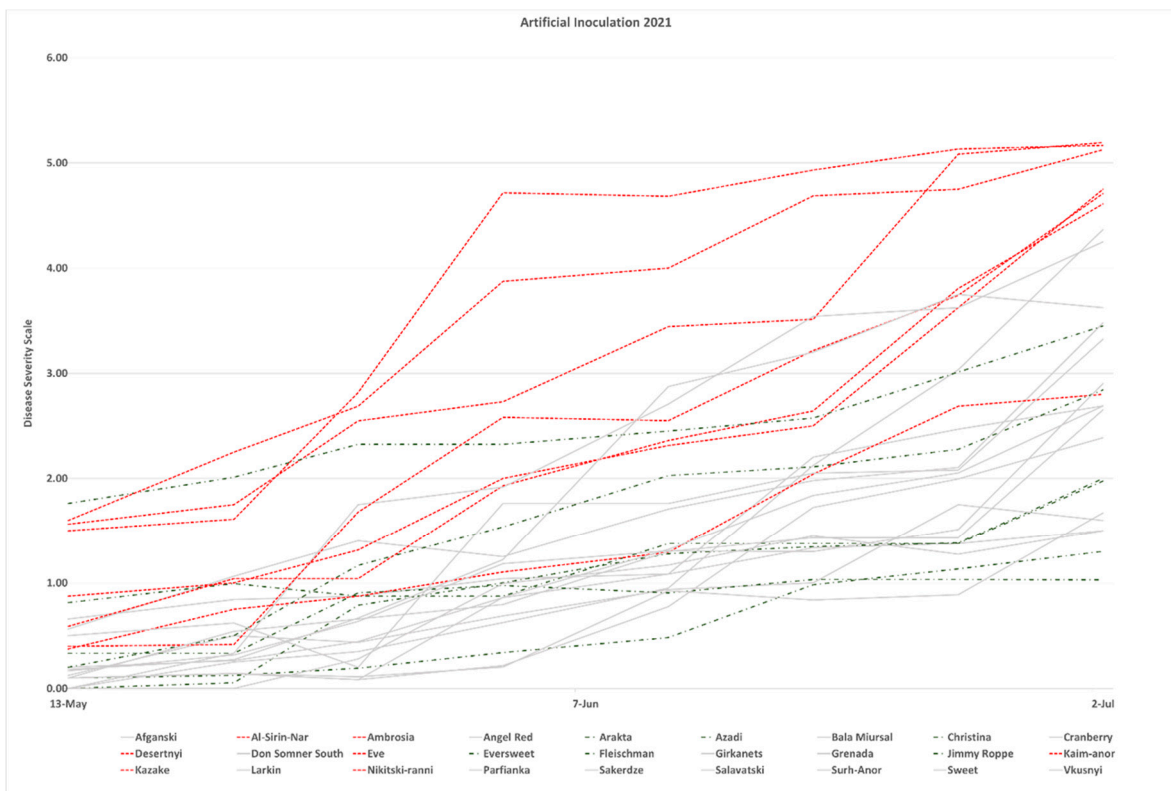

Figure S3. Disease progression of artificial inoculation 2021.

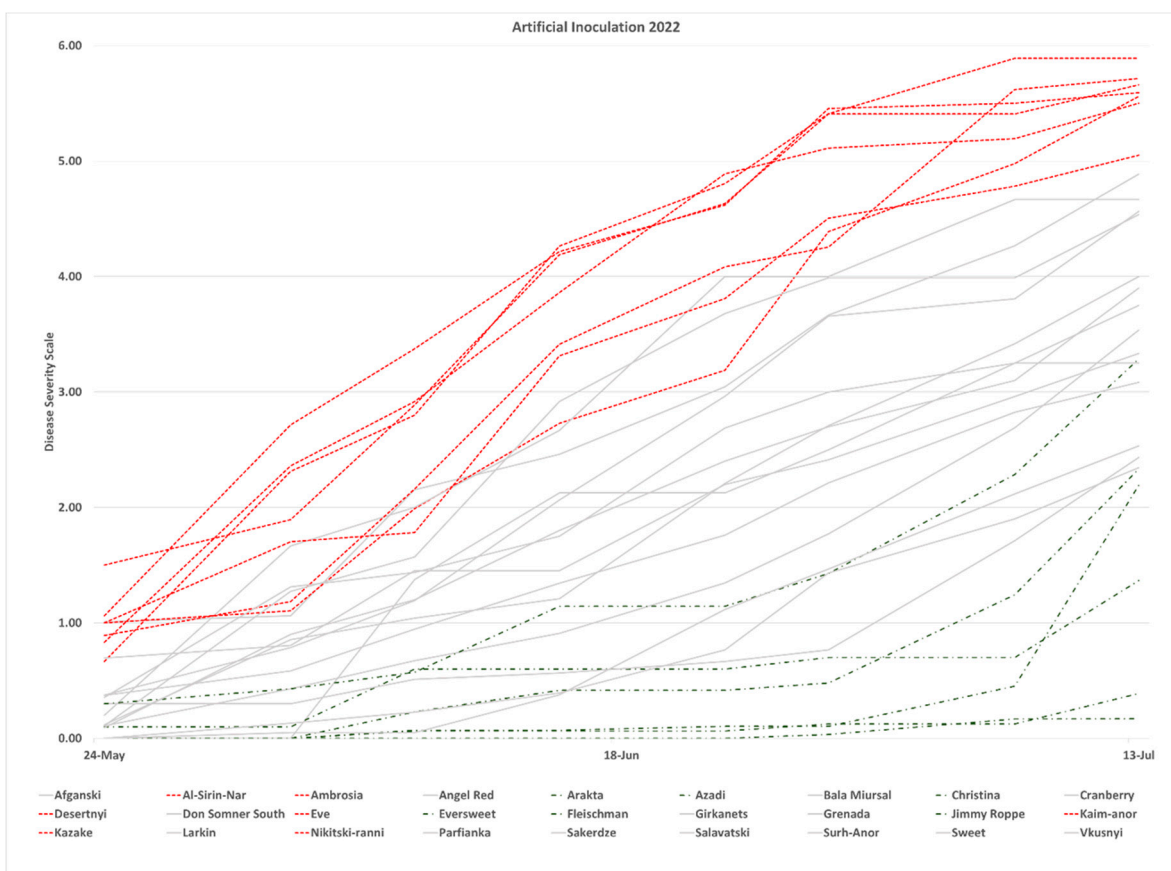

Figure S4. Disease progression of artificial inoculation 2022.
